# Supplementary figures and images for: Unveiling suspicious phishing attacks: enhancing detection with an optimal feature vectorization algorithm and supervised machine learning
Source: Frontiers journal article supplement (doi:10.3389/fcomp.2024.1428013), 2024-07-02

**Appendix A.** Optimal Feature Vectorization Algorithm (OFVA)


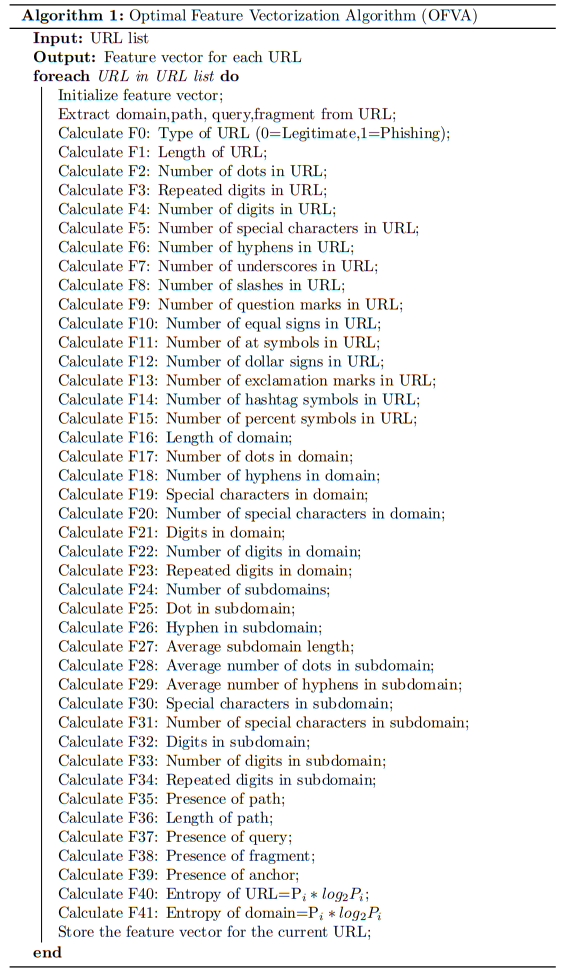

Supplement: Table_1.DOCX [file Table_1.DOCX]
